# Supplementary material for: Regulation of Septin Dynamics by the Saccharomyces cerevisiae Lysine Acetyltransferase NuA4
Source: PLoS One. 2011 Oct 3;6(10):e25336. doi: 10.1371/journal.pone.0025336 (PMC3184947; doi:10.1371/journal.pone.0025336)
Supplement: Table S3 — NuA4 SDL Interactions. Detailed scoring of all SDL and SDS genetic interactions identified for the seven non-essential NuA4 mutants (eaf1Δ (YKB44); eaf3Δ (YKB1162); eaf5Δ (YKB658); eaf6Δ (YKB504); eaf7Δ (YKB530); yaf9Δ (YKB464); yng2Δ (YKB494)). Overexpression of all interacting genes was also tested in a wild type background strain (WT (YKB779)). The scoring legend is at the bottom of the table. (XLS) [file pone.0025336.s005.xls]

## Sheet: NuA4 SDL Results
		NuA4 Subunit
Interacting Gene		WT	EAF1	EAF3	EAF5	EAF6	EAF7	YAF9	YNG2
Systematic Name	Standard Name	YKB779	YKB44	YKB1162	YKB658	YKB504	YKB530	YKB464	YKB494	process	function	complex
Chromatin
YOR123C	LEO1					2	1			chromatin	histone methylation	PAF
YPR193C	HPA2		0							chromatin	histone acetyltransferase
YEL056W	HAT2						1			chromatin	histone acetyltransferase	Hat1-Hat2
Chromosome Segregation and Stability
GLC7 and its Regulators
YER133W	GLC7		0							spindle checkpoint	protein phosphatase
YKL193C	SDS22		0			2.5			S+	chromosome segregation	Glc7 regulator
YFR003C	YPI1		1							chromosome segregation	Glc7 regulator
YNL233W	BNI4	3	1				1			cytokinesis	Glc7 regulator
YAR014C	BUD14	3*	0							cytoskeleton structure	Glc7 regulator
YER054C	GIP2	3	1	3		3	2			glycogen metabolism	Glc7 regulator
YOR178C	GAC1		1				4			glycogen metabolism	Glc7 regulator
YBR050C	REG2		1		3		3			glucose metabolism	Glc7 regulator
Glycogen Metabolism
YER059W	PCL6		1							glycogen metabolism	Pho85 regulator
YPL219W	PCL8		2							glycogen metabolism	Pho85 regulator
YLR258W	GSY2		1							glycogen metabolism	glycogen synthase
DNA Damage
YML021C	UNG1	3	1							DNA damage	uracil DNA glycosylase
YOL043C	NTG2		1							DNA damage	base excision repair
YBL009W	ALK2	*	0+		0		1.5		S+	DNA damage	protein kinase
YEL037C	RAD23					2				DNA damage	nucleotide excision repair	NEF2
YNL250W	RAD50		2							DNA damage	nonhomologous end joining	Mre11
Cytoskeleton
YDR106W	ARP10		0							cytoskeleton structure	actin cytoskeleton	dynactin
YFL039C	ACT1	2	0+		0			S+	S+	cytoskeleton structure	actin cytoskeleton
YBR234C	ARC40		2							cytoskeleton structure	actin cytoskeleton	Arp2/3
YDR388W	RVS167			S+			2			cytoskeleton structure	actin cytoskeleton
YBR059C	AKL1	2.5*	1		2.5		1		S+	cytoskeleton structure	protein kinase
YBL007C	SLA1		0		0	S+				cytoskeleton structure	actin cytoskeleton
YDR183W	PLP1		2							cytoskeleton structure	beta-tubulin folding
YJR076C	CDC11	3	0		2	1	2	2	0	cytokinesis	cytokinesis	septin
YDL225W	SHS1	3	0	2	1		2	2	0	cytokinesis	cytokinesis	septin
YBR038W	CHS2		1							cytokinesis	chitin synthase
YBR023C	CHS3		2							cytokinesis	chitin synthase
Transport
YLR078C	BOS1		0						S+	vesicle-mediated transport	ER-Golgi transport	SNARE
YDR498C	SEC20		2							vesicle-mediated transport	Golgi-ER transport	SNARE
YAL030W	SNC1	3*	1		1		1.5		S+	vesicle-mediated transport	Golgi-PM transport	SNARE
YGL198W	YIP4		2	S+						vesicle-mediated transport	Rab GTPase interactor
YPL145C	KES1	*			0.5		1		0+	vesicle-mediated transport	post-Golgi transport
YBR172C	SMY2	*	S+		0		1.5		S+	vesicle-mediated transport	ER-Golgi transport
YDL210W	UGA4	3				1.5			S+	transport	GABA/putrescine transport
YFL040W	YFL040W	*			1				S+	transport	sugar transport
Ubiquitin and Proteosome
YML088W	UFO1	3.5				2			S+	ubiquitination	ubiquitin protein ligase	SCF ubiquitin ligase
YOR261C	RPN8	3.5	0+	1	0	1	0		0+	proteosome	proteosome regulator
Cell Cycle
YOR083W	WHI5		0							mitosis	transcriptional repressor
YLR394W	CST9		0					S+	S+	meiosis	SUMO ligase
Mitochondria
YGR132C	PHB1					2				mitochondria	protein chaperone
YBR026C	ETR1		0						S+	mitochondria	lipid biosynthesis
YAL048C	GEM1						0		S+	mitochondria	mitochondrial morphology
YDR326C	YSP2		2		2.5		1.5			mitochondria	apoptosis
Transcription and RNA Processing
YMR268C	PRP24	3	1						S+	mRNA processing	mRNA splicing	spliceosome
YGR013W	SNU71					1	1.5	S+		mRNA processing	mRNA splicing	spliceosome
YCL011C	GBP2		0+			2.5				mRNA processing	mRNA nuclear export
YGL130W	CEG1					2.5			S+	mRNA processing	mRNA 5' capping
YPR144C	NOC4		0+		1					rRNA processing	rRNA maturation and export
YIR015W	RPR2		1							tRNA processing	ribonuclease P regulator	RNase P
YDL036C	PUS9	3	0	1	1.5					tRNA processing	tRNA synthase
YBL093C	ROX3		S+				0		S+	transcription	RNA polymerase	RNA pol II mediator
YDR253C	MET32					2				transcription	transcriptional regulator
Translation
YBR031W	RPL4A						1.5			translation	ribosome structure
YJL138C	TIF2						2			translation	translation initiation
YBL054W	YBL054W		S+				2			translation	ribosome biosynthesis
YLR387C	REH1	3	1						S+	translation	ribosome biosynthesis
Stress Response
YML028W	TSA1		1							stress response	peroxidase
YIL010W	DOT5					2.5		S+	S+	stress response	peroxidase
YKL062W	MSN4	*			2	2				stress response	transcriptional activator
YPL240C	HSP82						2			stress response	protein refolding
YOR008C	SLG1	*			1		2	S+	S+	stress response	transmembrane receptor
Metabolism&Biosynthesis
YBR265W	TSC10						2		S+	biosynthesis	oxidoreductase
YOR245C	DGA1						2			biosynthesis	diacylglycerol acyltransferase
YOR241W	MET7		2							biosynthesis	folylpolyglutamate synthase
YBR243C	ALG7	3	0						S+	biosynthesis	glucosamine transferase
YDR503C	LPP1		0						S+	metabolism	phosphatidate phosphatase
YBR183W	YPC1						1.5			metabolism	ceramidase
YOL136C	PFK27		0		1.5			S+		metabolism	glycolysis regulation
YBL036C	YBL036C						2			metabolism	racemase
Unknown
YBR262C	AIM5						2			unknown	unknown
YDR290W	YDR290W		0							unknown	unknown
YOR392W	YOR392W						1			unknown	unknown
YFL012W	YFL012W		2						S+	unknown	unknown
YLL059C	YLL059C		2			S+				unknown	unknown
YAR066W	YAR066W		0				1		S+	unknown	unknown
YFL010C	WWM1		0		0			S+	S+	unknown	unknown
YPL067C	YPL067C						1		0+	unknown	unknown
YCR051W	YCR051W					2				unknown	unknown
YDL129W	YDL129W	*			1.5		1.5	S+		unknown	unknown
YNL058C	YNL058C	3	0						S+	unknown	unknown
YDR068W	DOS2						2			unknown	unknown
YML018C	YML018C		1						S+	unknown	unknown
YNL042W	BOP3					2	1			unknown	unknown
YKL219W	COS9		2							unknown	unknown
YCR023C	YCR023C		0+				2			unknown	unknown
YKL168C	KKQ8	2	0							unknown	protein kinase (putative)
Legend
*	caused slow growth in wildtype as determined by Sopko et al., 2006
S+	slow growth by streak test
0+	inviable by streak test
Scoring
blank - no growth defect
3 - minor growth defect
2 - medium growth defect
1 - major growth defect
0 - inviable
References
Sopko et al. (2006). Mapping Pathways and Phenotypes by Systematic Gene Overexpression. Mol Cell 21, 319-330.
